# Supplementary material for: Preparation and utility of a self-lubricating & anti-wear graphene oxide/nano-polytetrafluoroethylene hybrid
Source: Royal Society of Chemistry journal article supplement (doi:10.1039/c4ra01964d), 2014-01-01
Supplement: c4ra01964d1.pdf [file c4ra01964d1.pdf]

## **Preparation and utility of self-lubricating & anti-wear graphene oxide/nano-polytetrafluoroethylene Hybrid**

**Ting Huang<sup>a</sup>, Tongsheng Li<sup>a\*</sup>, Yuanshi Xin<sup>a</sup>, Bocheng Jin<sup>b</sup>, Zhongxin Chen<sup>a</sup>, Chao Su<sup>a</sup>,**

**Haiming Chen<sup>a</sup> and Steven Nutt<sup>b</sup>**

<sup>a</sup>State Key Laboratory of Molecular Engineering of Polymers, Department of Macromolecular Science, Fudan University, Shanghai, 200433, P. R. China and <sup>b</sup>Department of Chemical Engineering and Materials Science, University of Southern California, Los Angeles, CA, 90089-0214, United States.

### **Supplementary data**

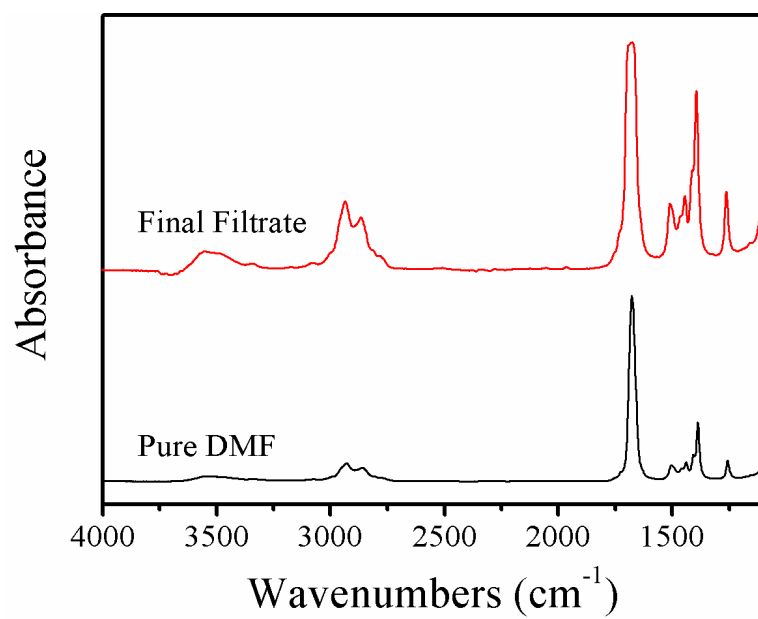

**Figure S1** FTIR spectra of Final filtrate and pure DMF, respectively.

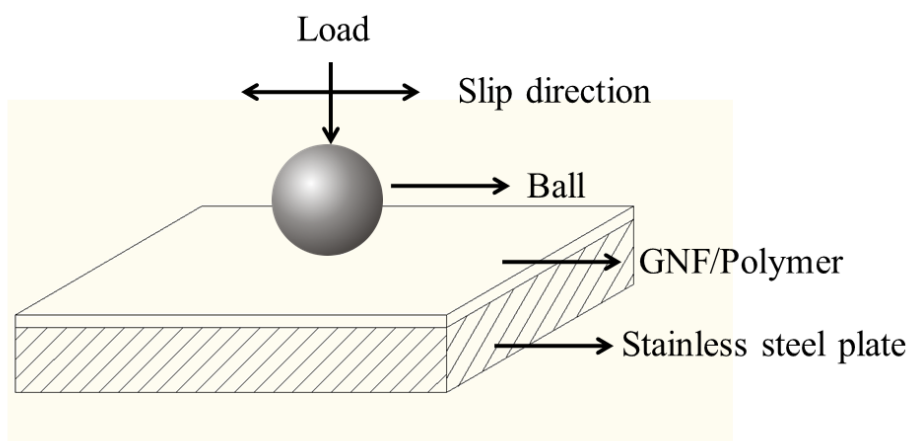

The specimen for a reciprocating friction and wear test

**Figure S2** Schematic of the contact configuration of the reciprocating friction and wear testing machine.

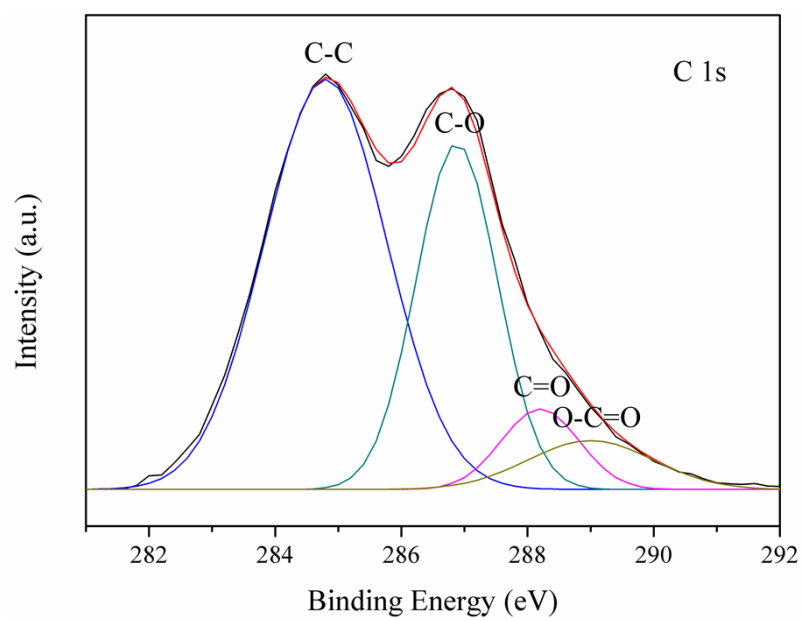

**Figure S3** C 1s XPS spectrum of GO.

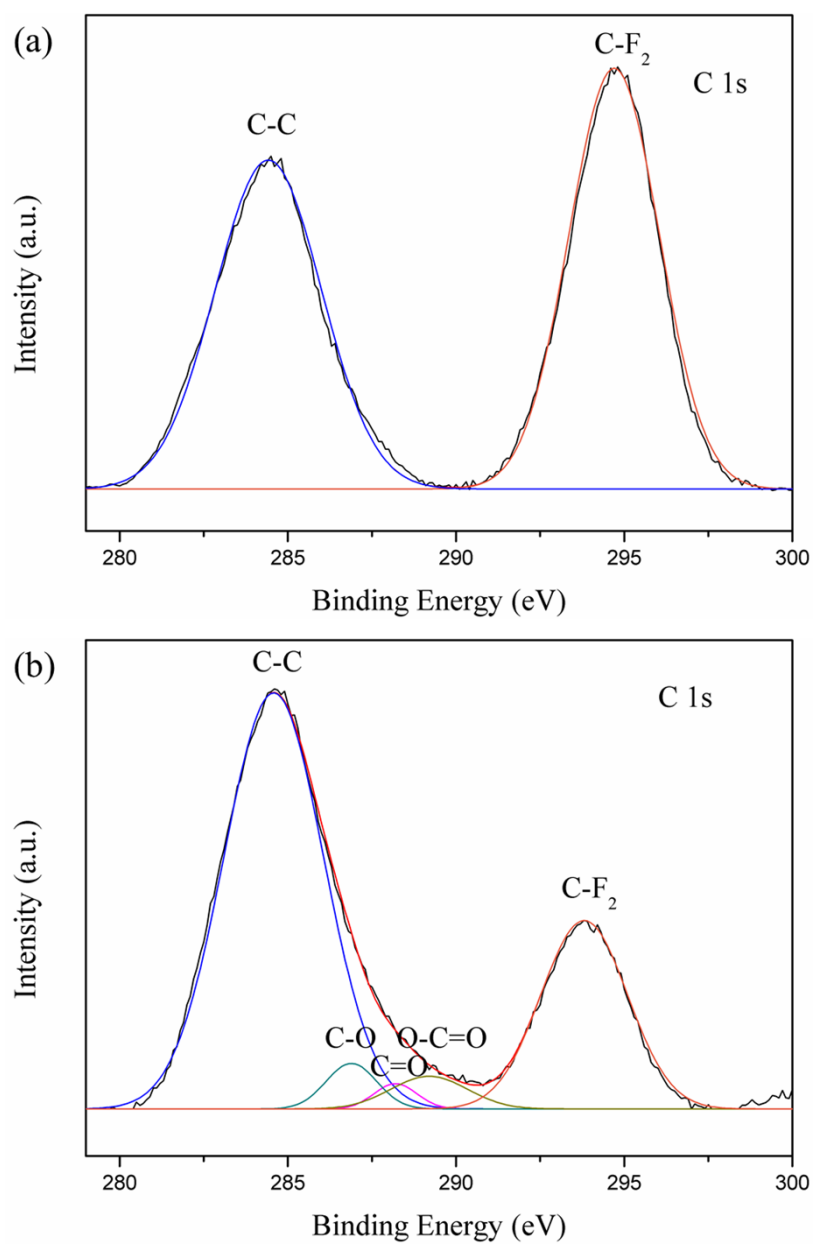

**Figure S4** C 1s XPS spectra of nano-PTFE and nano-PTFE-AA.

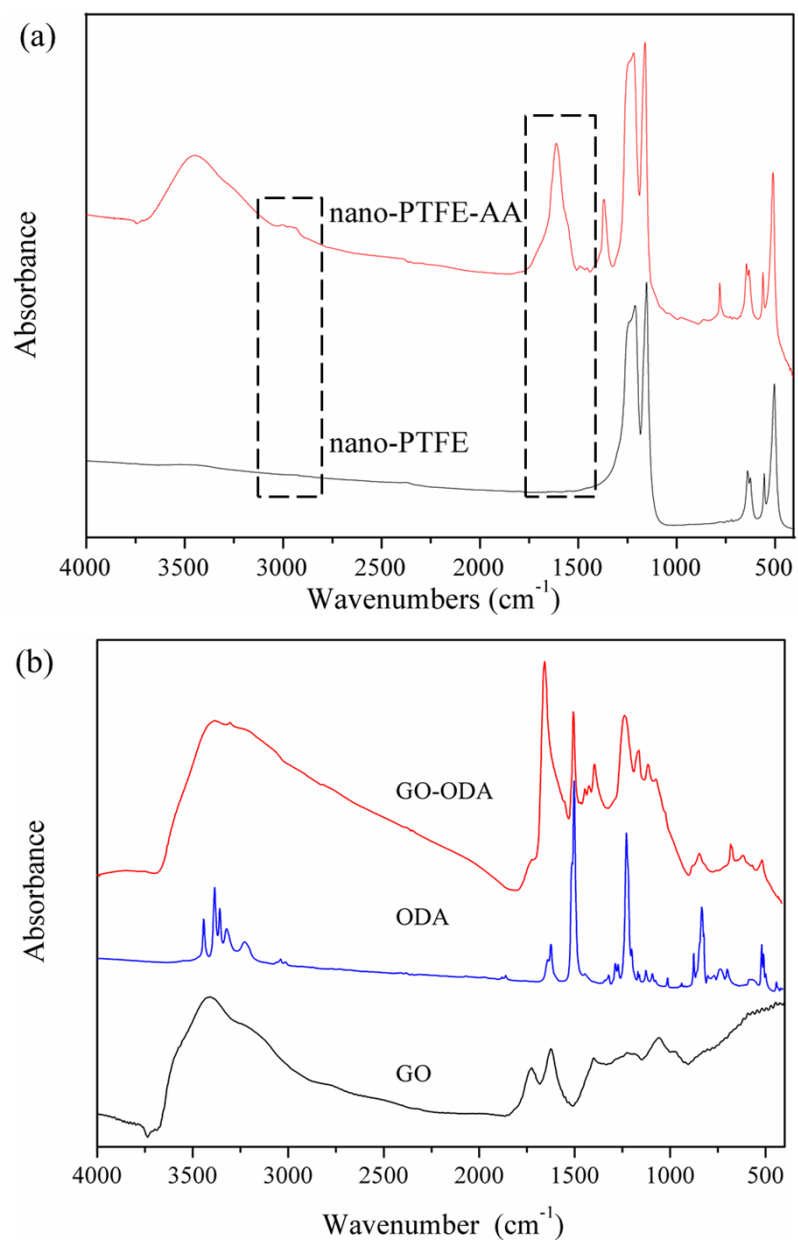

**Figure S5** (a) FTIR spectra of nano-PTFE and nano-PTFE-AA; (b) FTIR spectra of GO, ODA and GO-ODA.

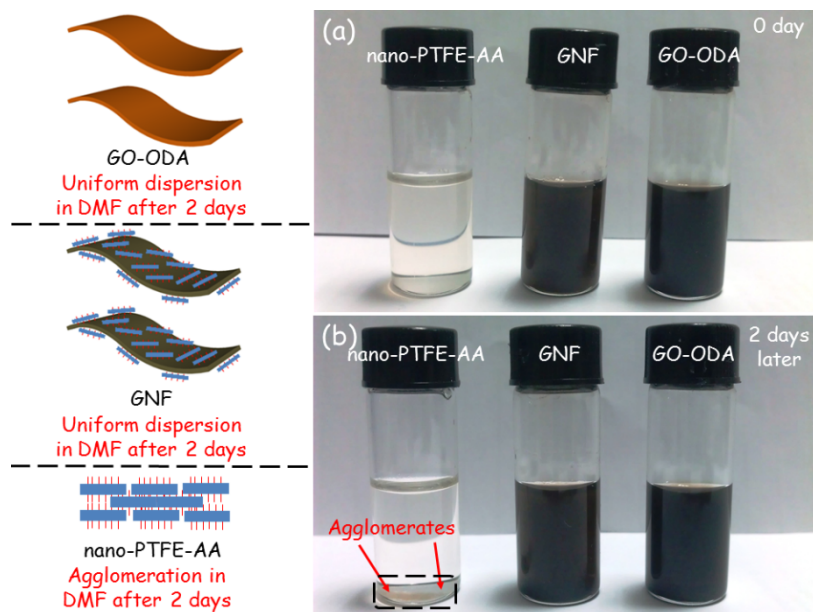

**Figure S6** The dispersibility and time-dependent stability of nano-PTFE-AA, GNF, GO-ODA in DMF solvent

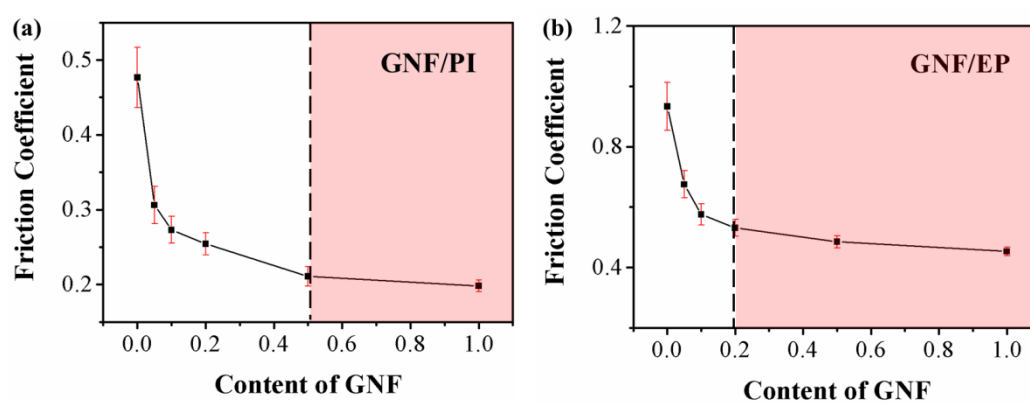

**Figure S7** Relationship of average friction coefficient values for the (a) GNF/PI and (b) GNF/EP specimens with GNF content. (reciprocating frequency: 10 Hz, sliding distance: 480 m, load: 10 N, RH: 40%)



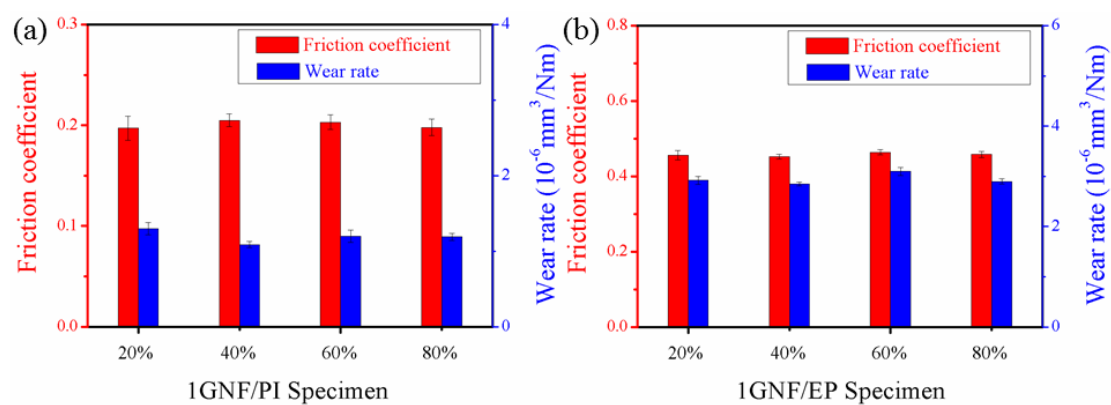

**Figure S8** (a) Friction coefficient and wear rate of 1GNF/PI and 1GNF/EP specimens under various RH conditions.

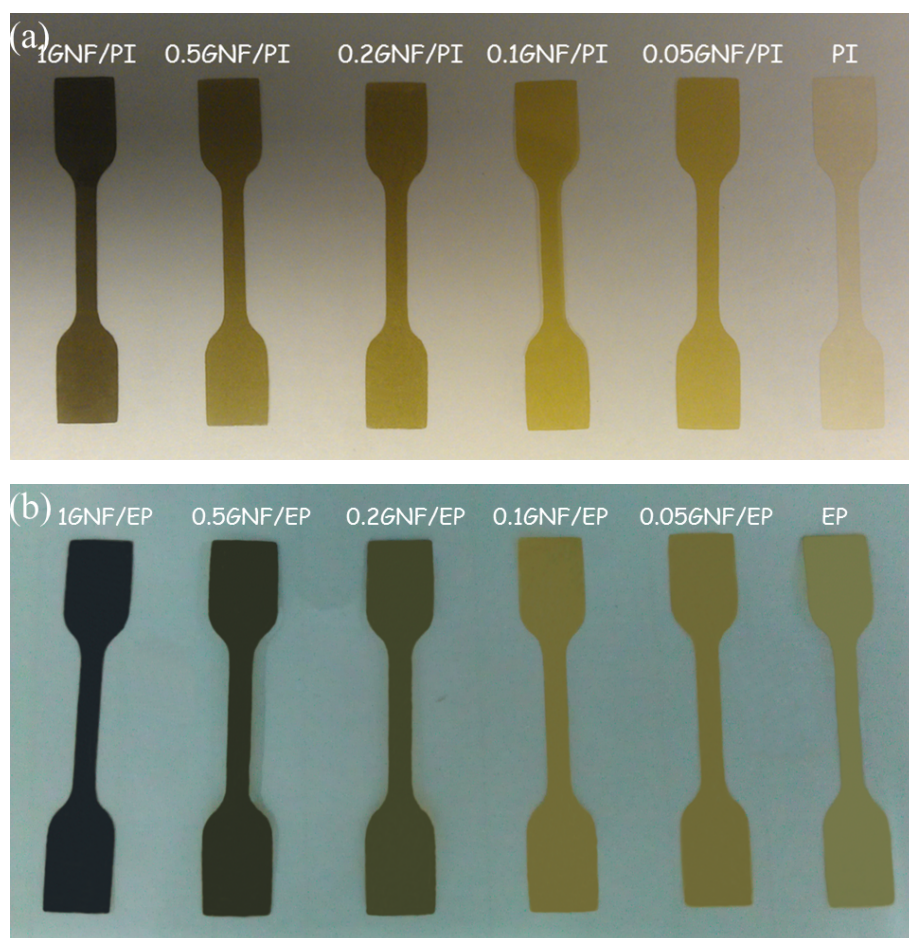

**Figure S9** Appearance for dog-bone type specimens of (a) neat PI and GNF/PI, (b) neat EP and GNF/EP composite films.

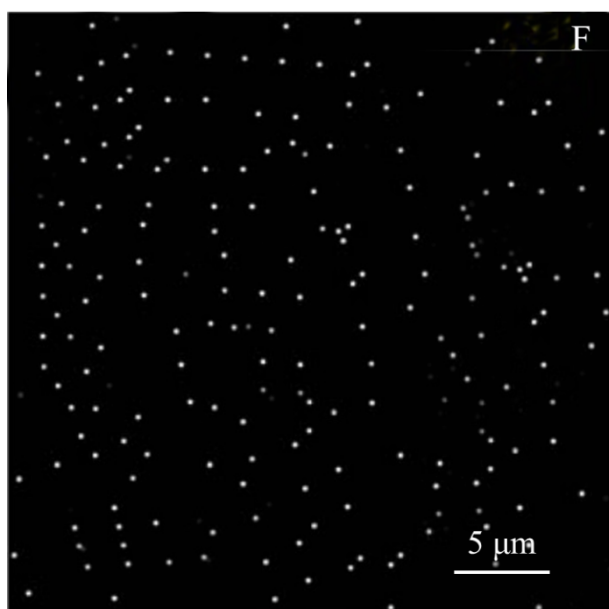

**Figure S10** EDX elemental mapping of F dispersion on the counterpart.

**Table S1.** Tribological properties of neat PI, 1nano-PTFE-AA/PI, 1GO-ODA/PI, 1GNF/PI, neat EP, 1nano-PTFE-AA/EP, 1GO-ODA/PI and 1GNF/EP specimens.

| Specimens        | Friction coefficient | Wear rate (mm <sup>3</sup> /Nm) |
|------------------|----------------------|---------------------------------|
| neat PI          | 0.477                | $1.56 \times 10^{-4}$           |
| 1nano-PTFE-AA/PI | 0.285                | $8.96 \times 10^{-5}$           |
| 1GO-ODA/PI       | 0.403                | $1.94 \times 10^{-5}$           |
| 1GNF/PI          | 0.198                | $1.09 \times 10^{-6}$           |
| neat EP          | 0.934                | $2.83 \times 10^{-4}$           |
| 1nano-PTFE-AA/EP | 0.677                | $1.72 \times 10^{-4}$           |
| 1GO-ODA/EP       | 1.213                | $3.17 \times 10^{-5}$           |
| 1GNF/EP          | 0.458                | $2.90 \times 10^{-6}$           |

**Table S2.** Microhardness and tensile strength of neat PI, GNF/PI, neat EP and GNF/EP specimens.

| Specimens  | Microhardness (MPa) | Tensile strength (MPa) |
|------------|---------------------|------------------------|
| PI         | 398                 | 87                     |
| 0.05GNF/PI | 459                 | 95                     |
| 0.1GNF/PI  | 498                 | 102                    |
| 0.2GNF/PI  | 533                 | 109                    |
| 0.5GNF/PI  | 557                 | 121                    |
| 1GNF/PI    | 595                 | 132                    |
| EP         | 277                 | 58                     |
| 0.05GNF/EP | 334                 | 64                     |
| 0.1GNF/EP  | 365                 | 69                     |
| 0.2GNF/EP  | 389                 | 74                     |
| 0.5GNF/EP  | 408                 | 83                     |
| 1GNF/EP    | 423                 | 91                     |
